# Supplementary material
Source: PubMed Central journal article supplement (PMC6643682)
Supplement: ao7b01400_si_001.pdf [file ao7b01400_si_001.pdf]

## Supporting Information

### Drug-Triggered Self-Assembly of Linear Polymer into Nanoparticles for Simultaneous Delivery of Hydrophobic and Hydrophilic Drugs in Breast Cancer Cells

Sandeep Palvai, †,# Libi Anandi, ψ,# Sujit Sarkar,ξ Meera Augustus,ψ Sudip Roy,ξ Mayurika Lahiri, ψ\* Sudipta Basu†\*

† Department of Chemistry, Indian Institute of Science Education and Research (IISER)-Pune, Dr. Homi Bhabha Road, Pashan, Pune, Maharashtra, India, 411008. E-mail: [sudipta.basu@iiserpune.ac.in](mailto:sudipta.basu@iiserpune.ac.in)

ψ Department of Biology, Indian Institute of Science Education and Research (IISER)-Pune, Dr. Homi Bhabha Road, Pashan, Pune, Maharashtra, India, 411008. Email: [mayurika.lahiri@iiserpune.ac.in](mailto:mayurika.lahiri@iiserpune.ac.in)

ξ CSIR-National Chemical Laboratory, Pune, Dr. Homi Bhabha Road, Pashan, Pune, Maharashtra, India, 411008

# These authors contributed equally to this work.

#### Content:

**Page S2:** 1H NMR spectra of PMAc and PMS-PTX conjugate (**Figure S1, S2**).

**Page S3:** 1H and 195Pt NMR spectra of PMA-PTX-CDDP conjugate (**Figure S3, S4**).

**Page S4:** Size, shape, drug loading and EDX spectra of PMA-PTX-CDDP-NPs (**Figure S5, S6**).

**Page S5:** EDX spectra and distance distribution by MD simulation (**Figure S7, S8**).

**Page S6:** MD simulation and synthesis of PMA-RITC-PTX-CDDP conjugate (**Figure S9, S10**).

**Page S7:** 1H NMR spectra of PMA-ethylenediamine and PMA-RITC conjugate (**Figure S11, S12**).

**Page S8:** FESEM, AFM, and EDX of PMA-RITC-PTX-CDDP-NPs (**Figure S13, S14**).

**Page S9:** Internalization quantification and CLSM images (**Figure 15, S16**).

**Page S10:** Nuclear fragmentation quantification and CLSM images (**Figure S17, S18**).

**Page S11:** Quantification of stalled cell division and MTT assay (**Figure S19, S20**).

**Page S12:** Quantification of 3D spheroids, atom types, non-bonded parameters and angle (**Figure S21, Table S1 and S2**).

**Page S13:** Dihedral angle parameter (**Table S3**).

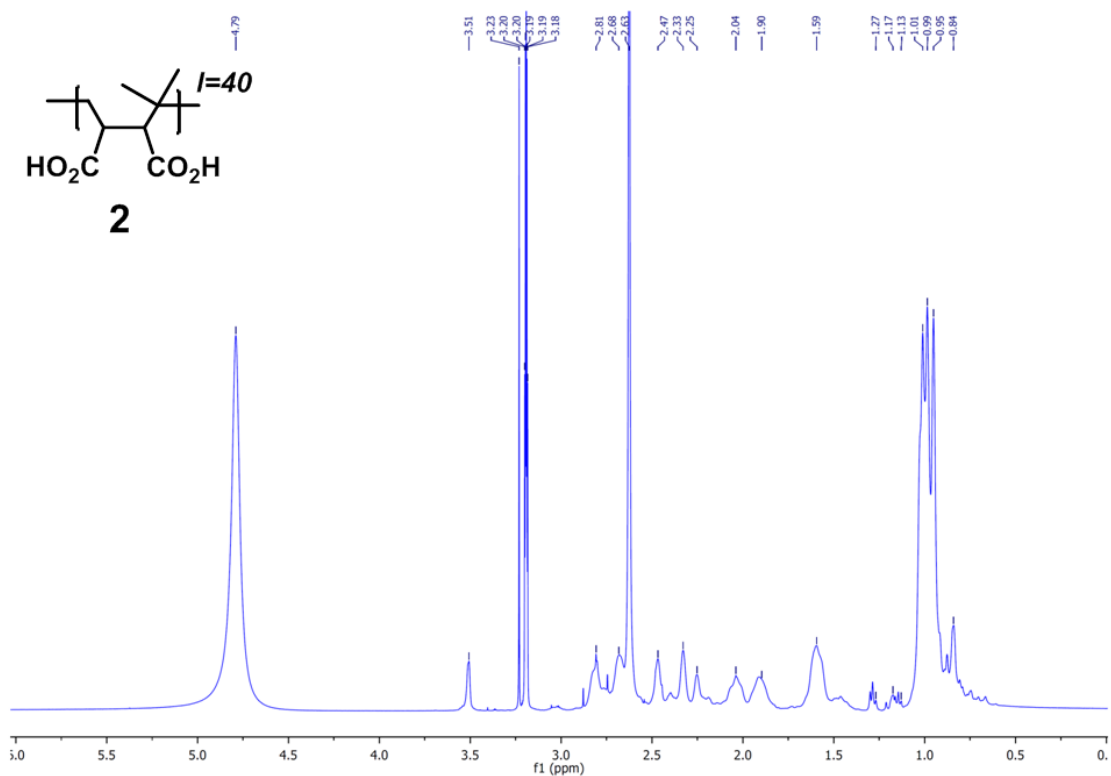

**Figure S1:**  $^1\text{H}$  NMR spectra of Poly(isobutylene-alt-maleic acid) (PMAc) 2.

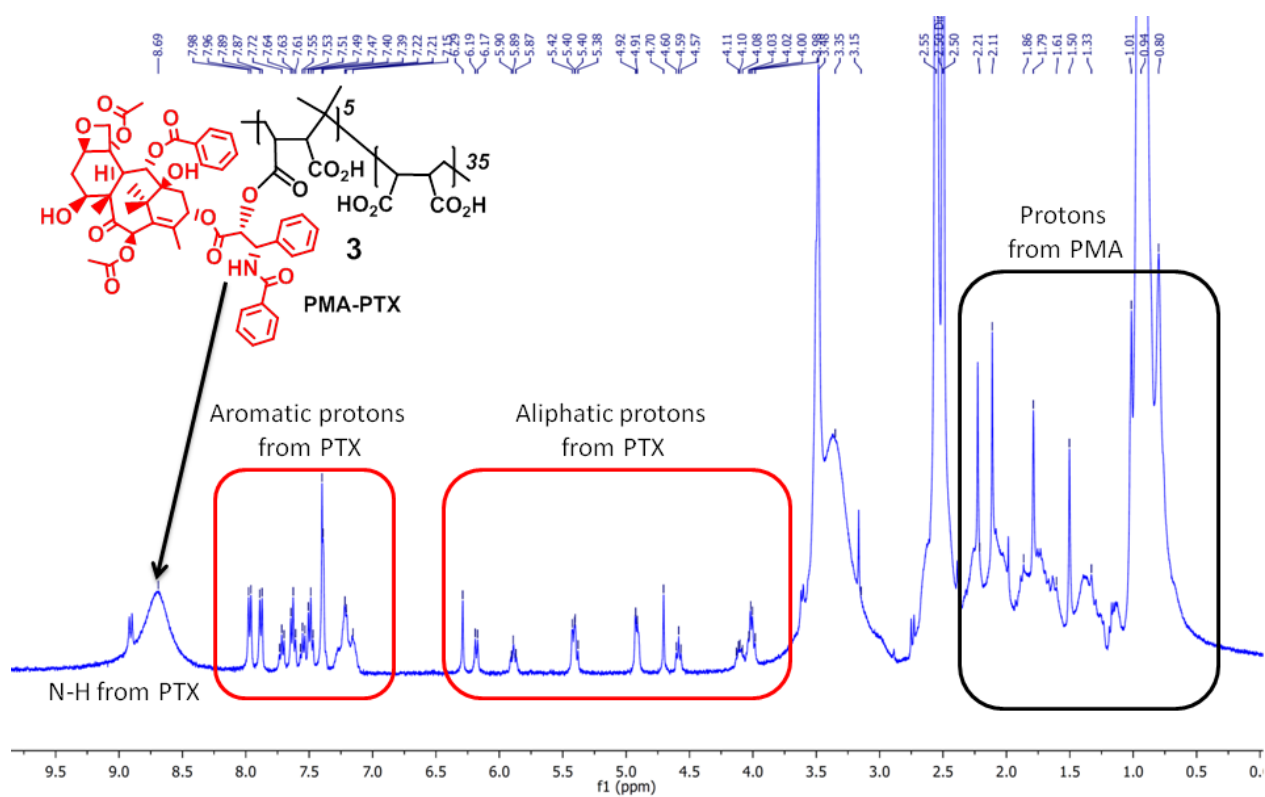

**Figure S2:**  $^1\text{H}$  NMR spectra of PMA-PTX conjugate 3.

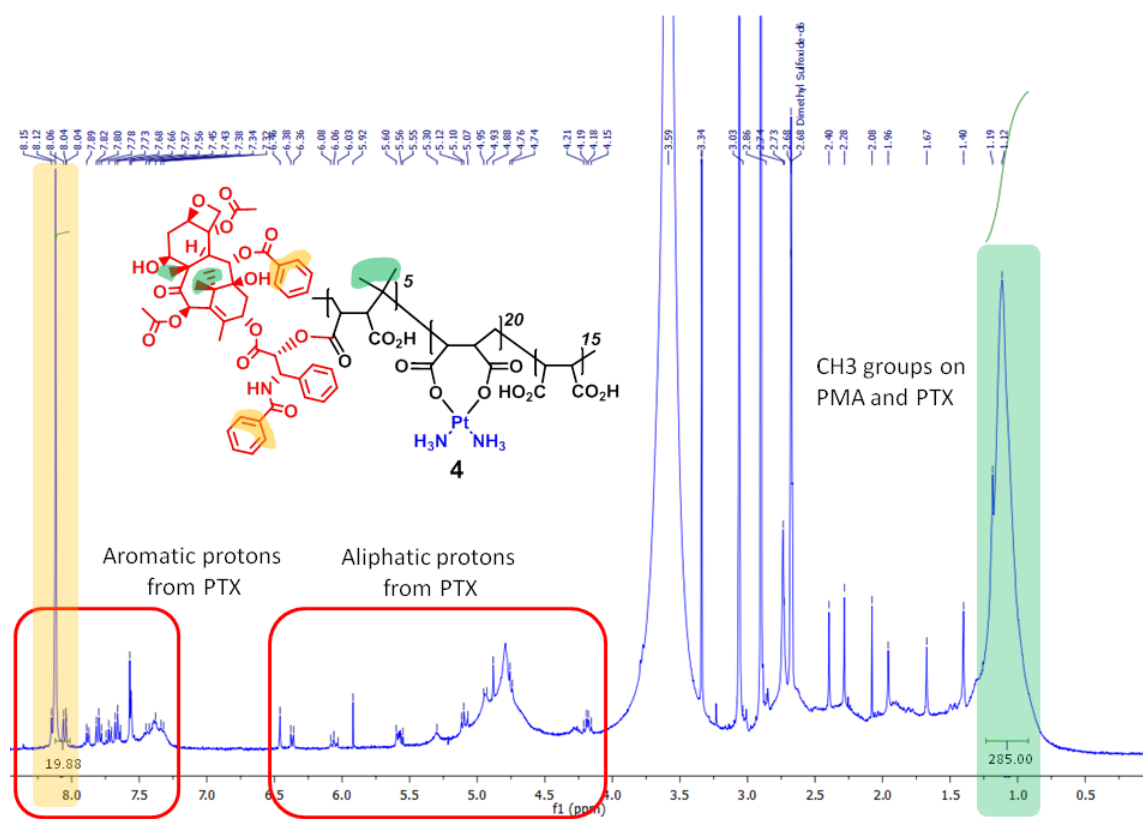

**Figure S3:**  $^1\text{H}$  NMR spectra of PMA-PTX-CDDP conjugate (4).

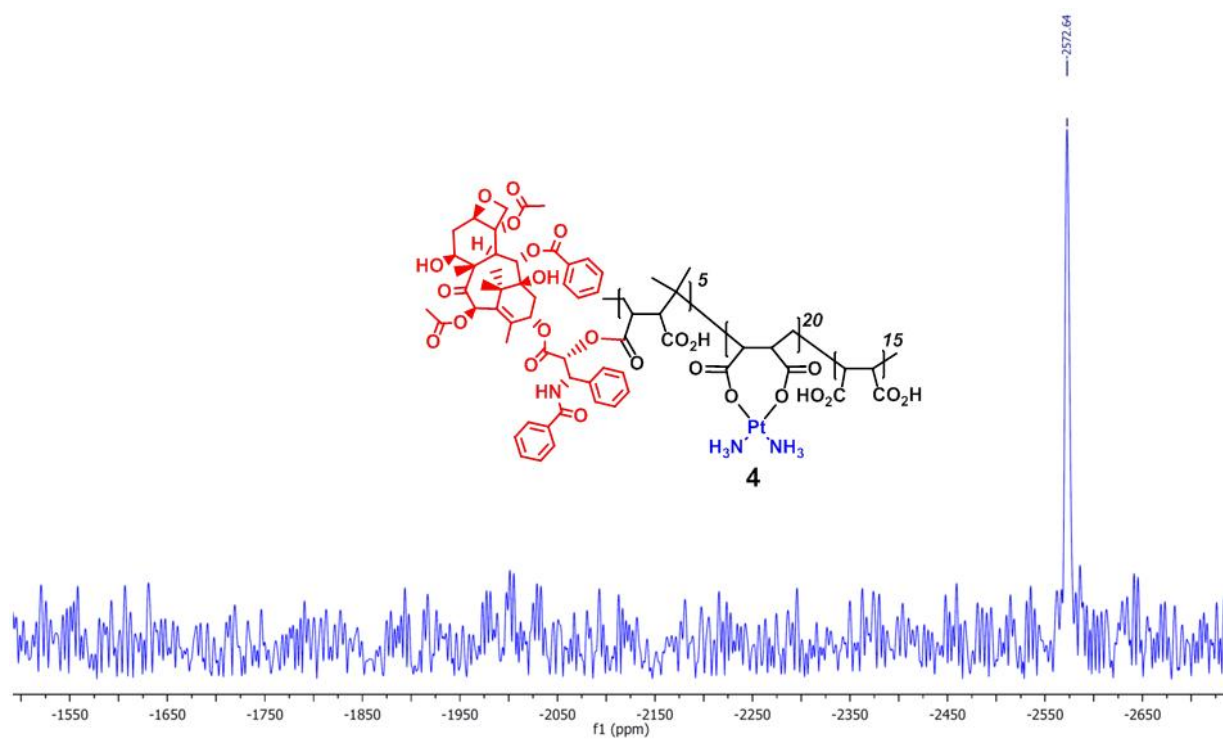

**Figure S4:**  $^{195}\text{Pt}$  NMR spectra of PMA-PTX-CDDP conjugate (4).

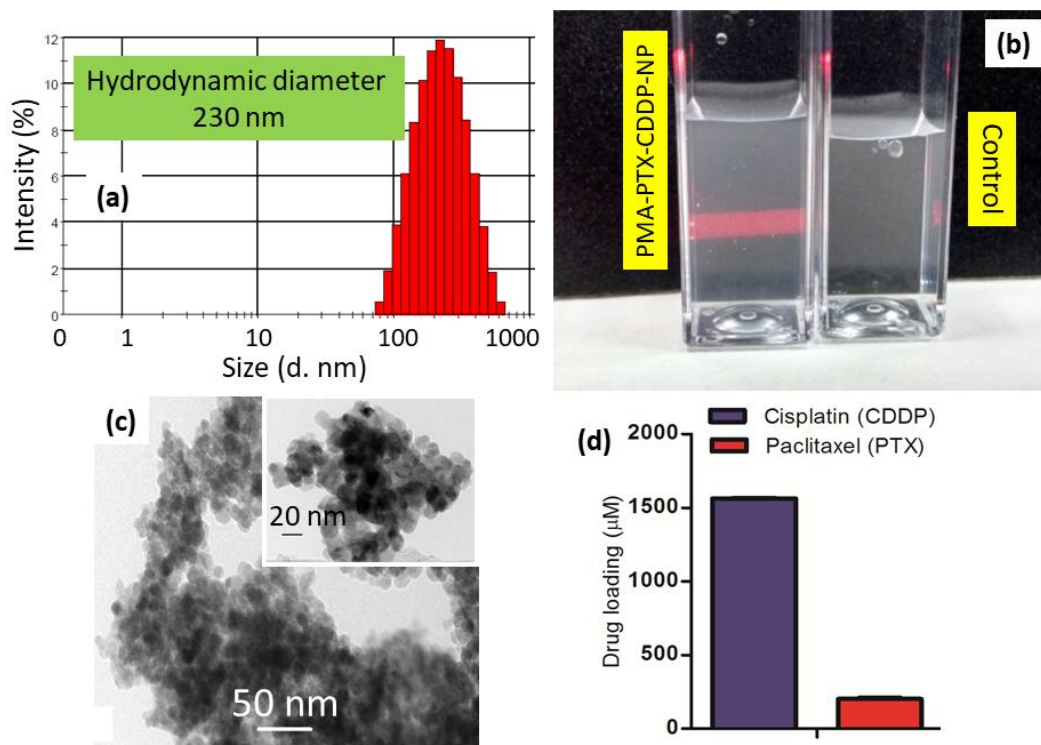

**Figure S5:** (a) Hydrodynamic diameter measurement of PMA-PTX-CDDP-NPs by dynamic light scattering (DLS). (b) Tyndall effect of PMA-PTX-CDDP-NPs. (c) TEM images of PMA-PTX-CDDP-NPs. (d) Loading of PTX and CDDP into the nanoparticle, determined by UV-Vis spectroscopy.

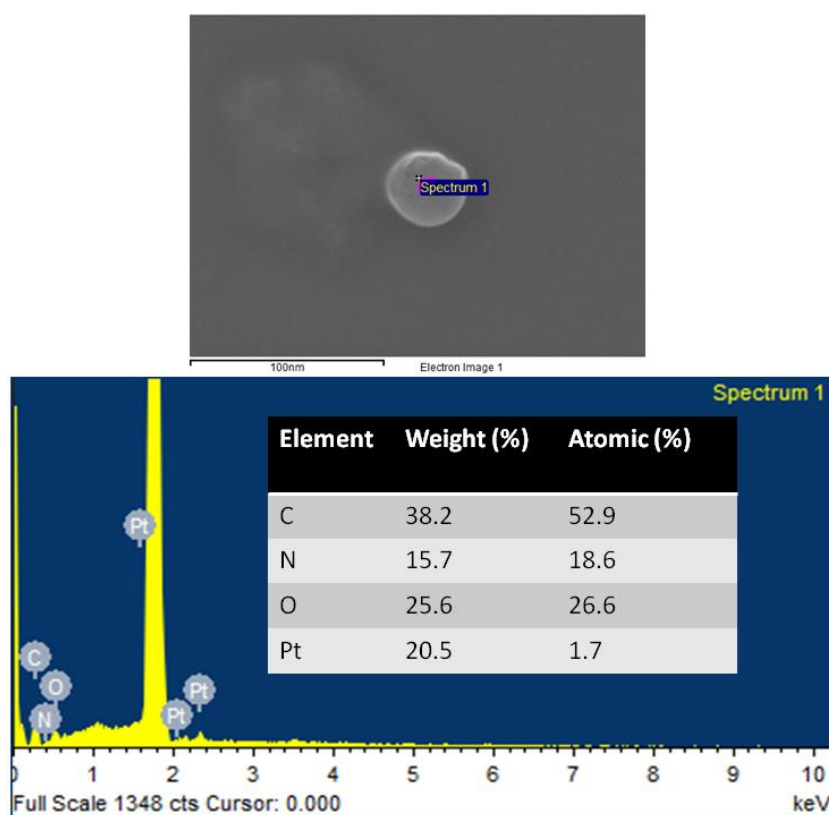

**Figure S6:** EDXS of PMA-PTX-CDDP-NPs to confirm the presence of cisplatin.

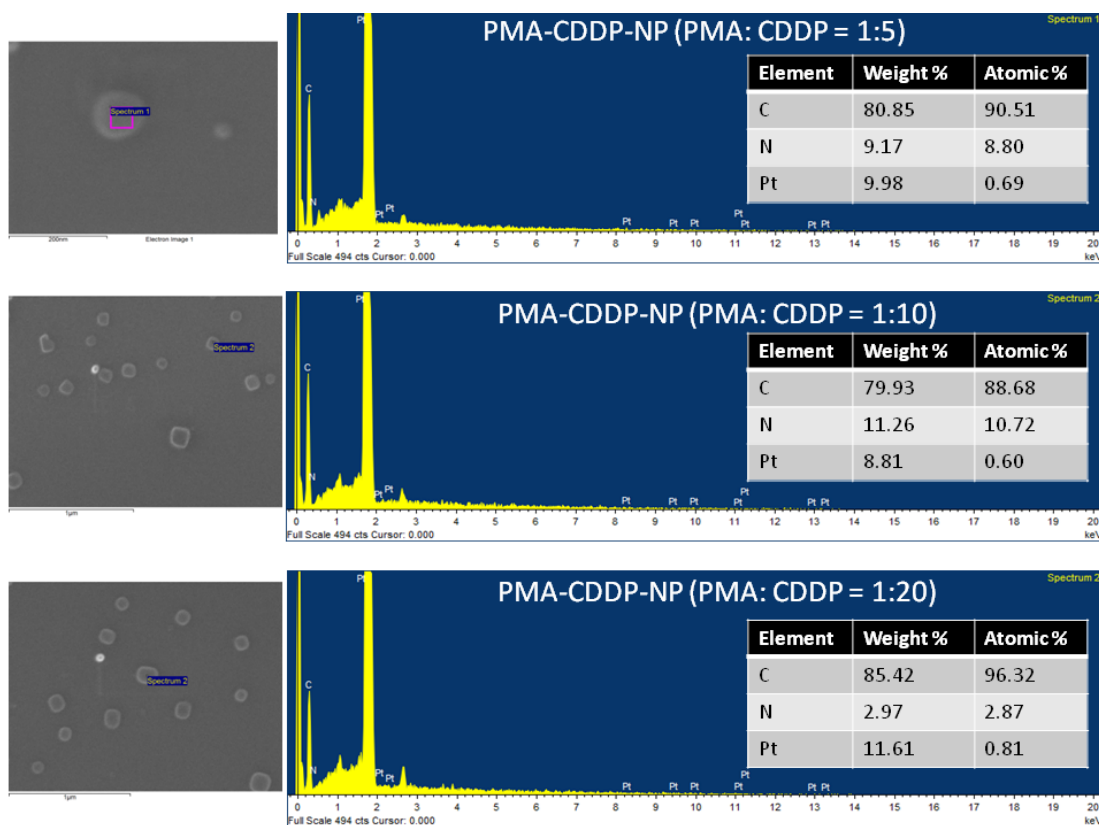

**Figure S7:** EDXS of PMA-CDDP-NPs at different molar ratios to show the presence of cisplatin.

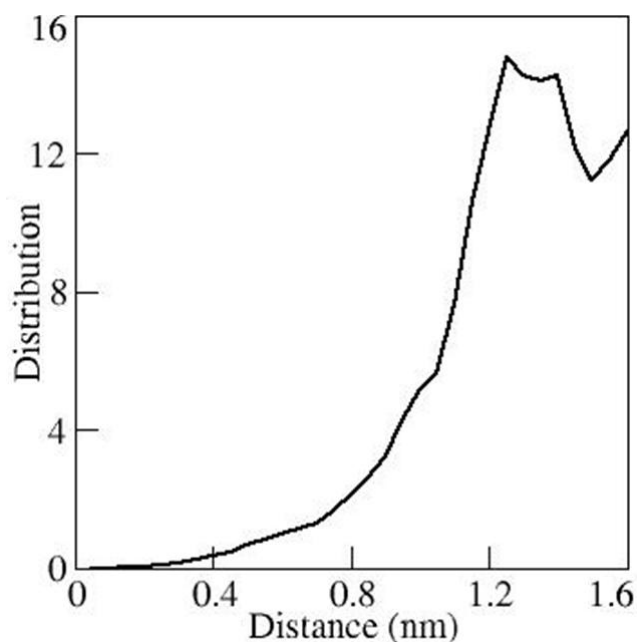

**Figure S8:** Distance distribution between hydrophobic Paclitaxel residues over last 10 ns of simulation time.

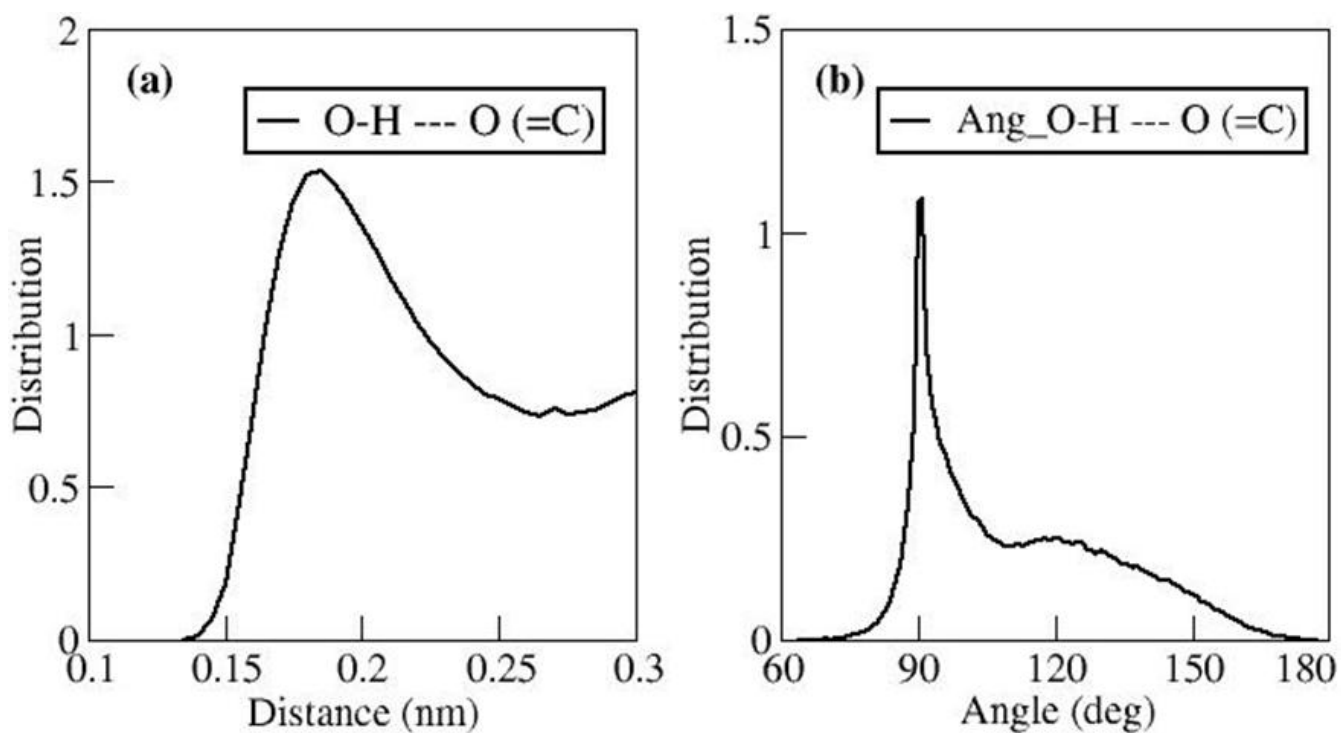

**Figure S9:** (a) Distance distribution between hydrogen and hydrogen bond acceptor for different possible hydrogen bonding sites. (b) Distribution hydrogen bond donor -hydrogen - hydrogen bond acceptor angles.

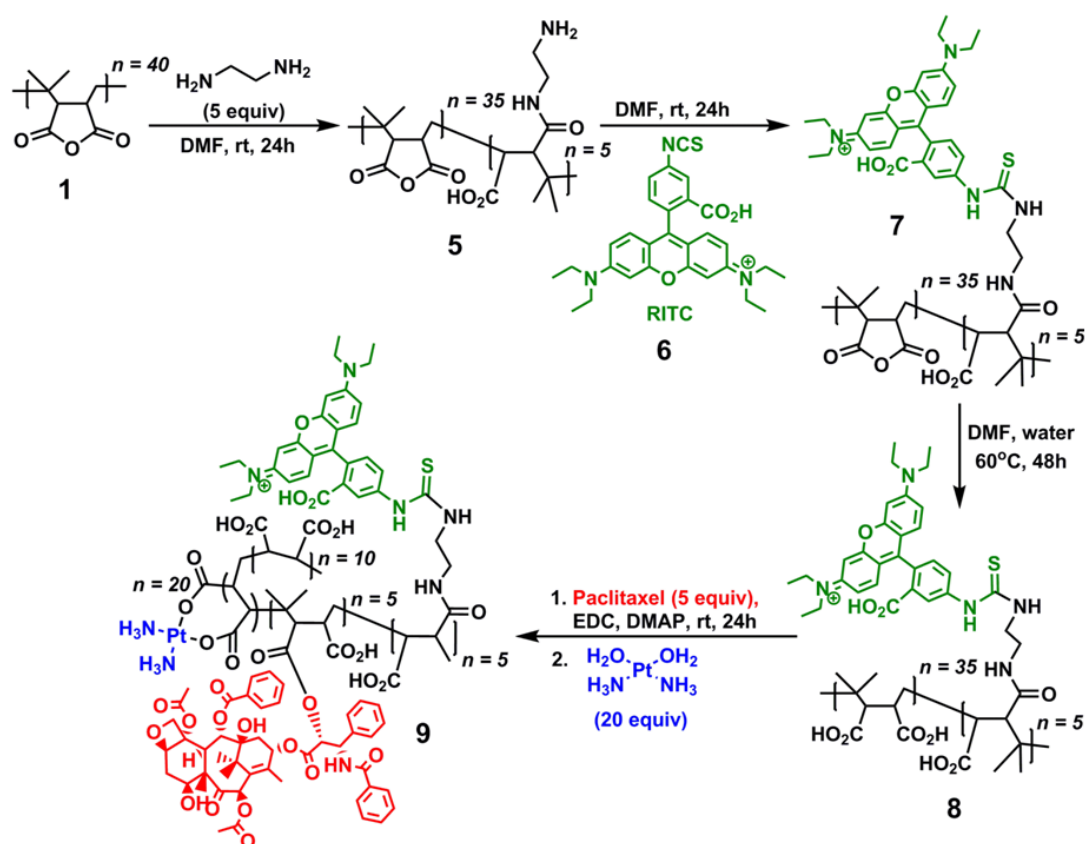

**Figure S10:** Synthetic scheme of PMA-RITC-PTX-CDDP conjugate (**9**).

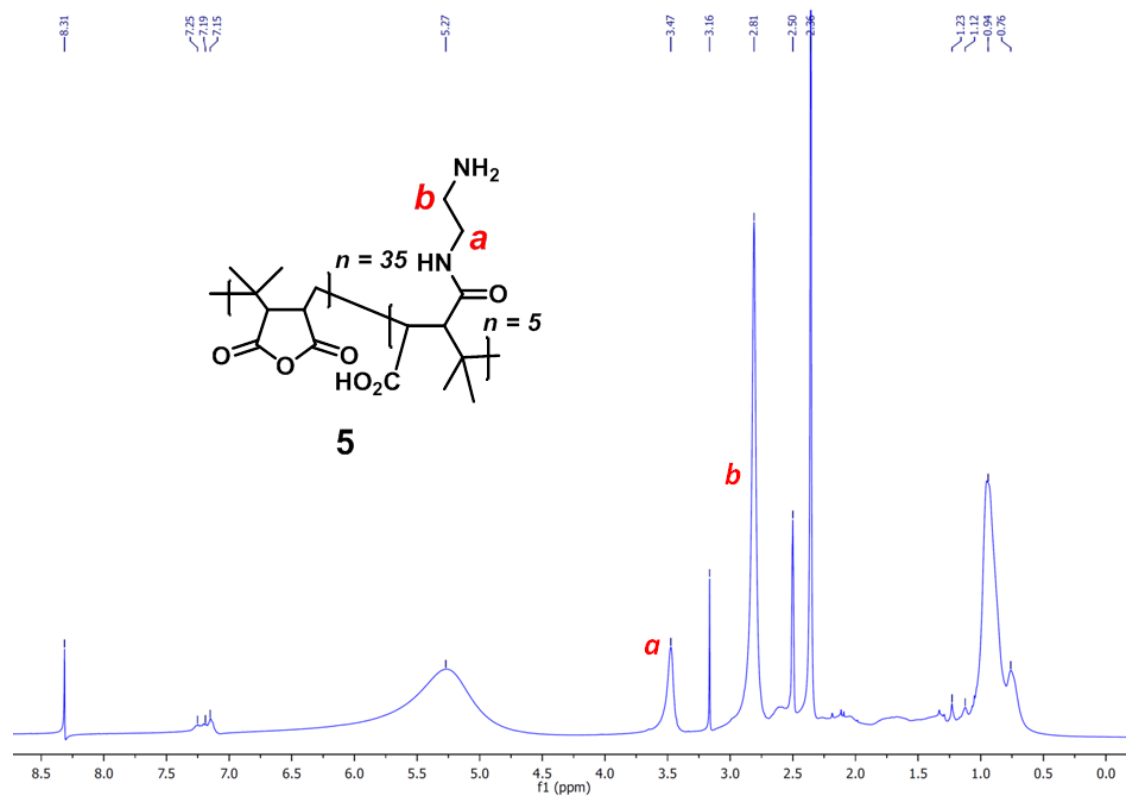

**Figure S11:**  $^1\text{H}$  NMR spectra of PMA-ethylenediamine conjugate (5).

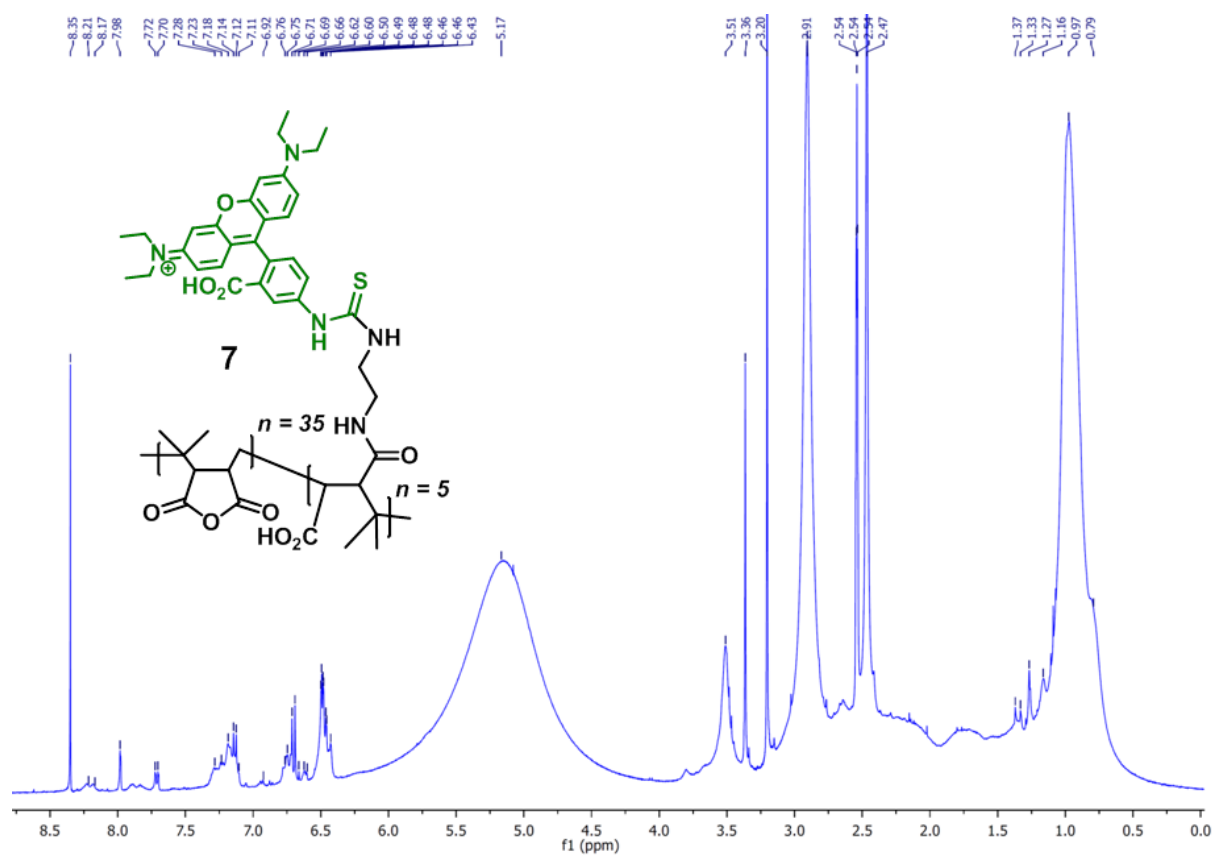

**Figure S12:**  $^1\text{H}$  NMR spectra of PMA-ethylenediamine-RITC conjugate (7).

### PMA-RITC-PTX-CDDP-NP

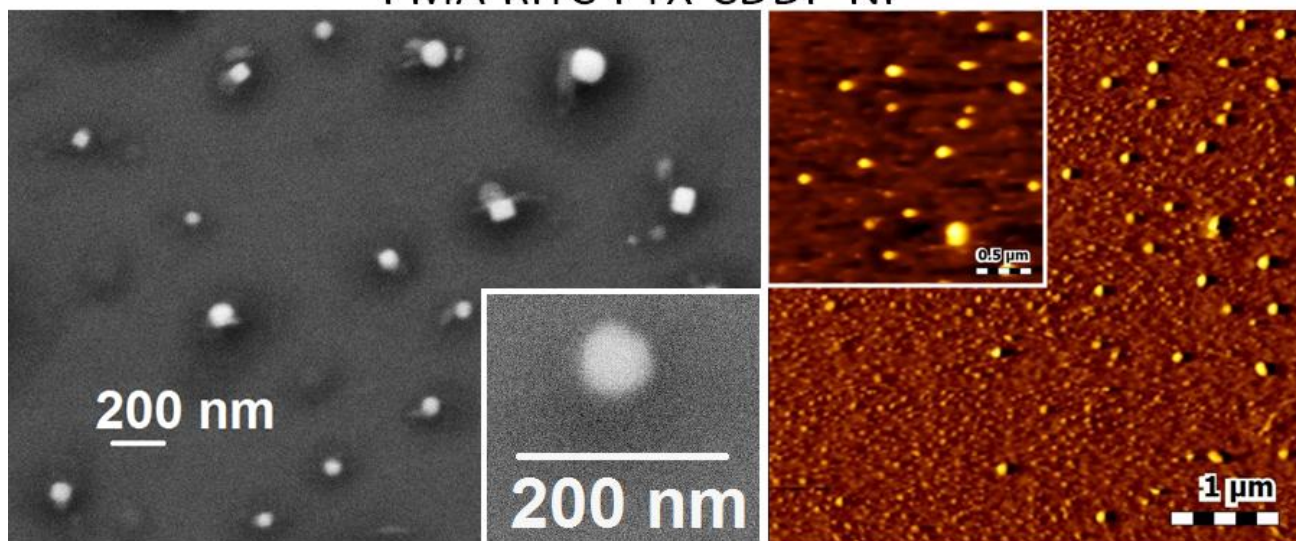

**Figure S13:** FESEM and AFM images of PMA-RITC-PTX-CDDP-NPs.

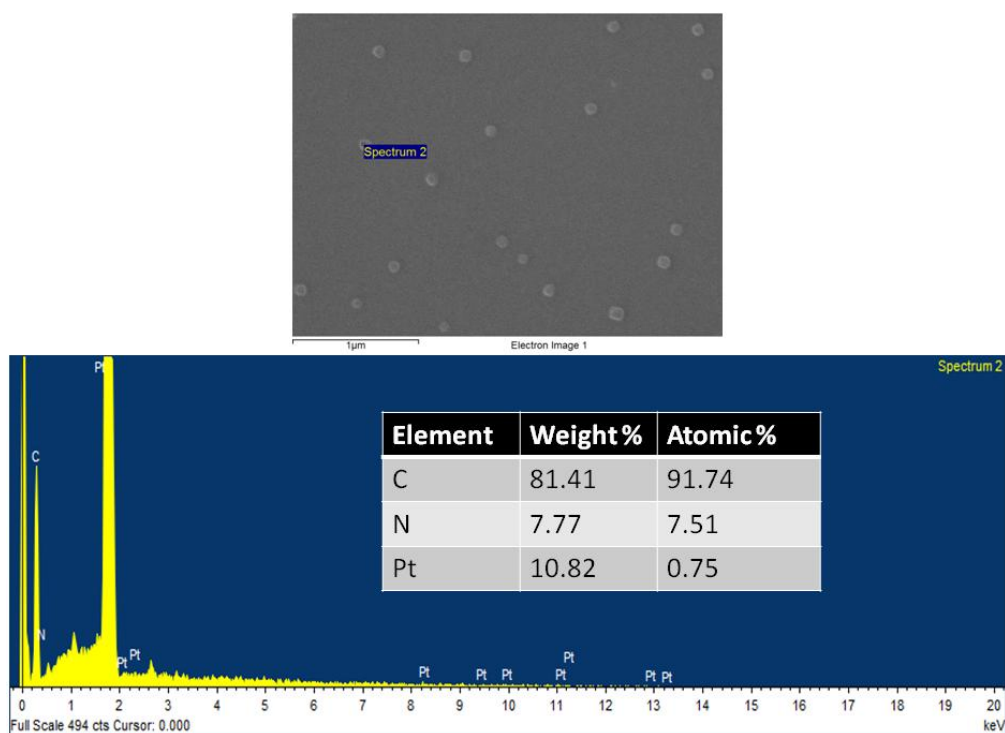

**Figure S14:** EDXS of PMA-RITC-PTX-CDDP-NPs to confirm the presence of cisplatin.



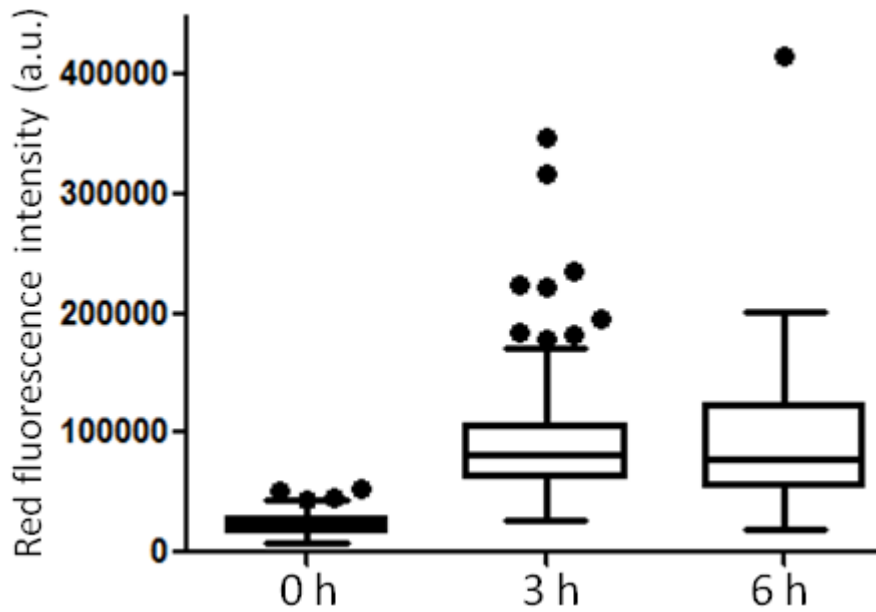

**Figure S15:** Quantification of red fluorescence intensity from CLSM at 0 h, 3 h and 6 h after incubation with red fluorescent PMA-RITC-PTX-CDDP-NPs in MCF7 cells.

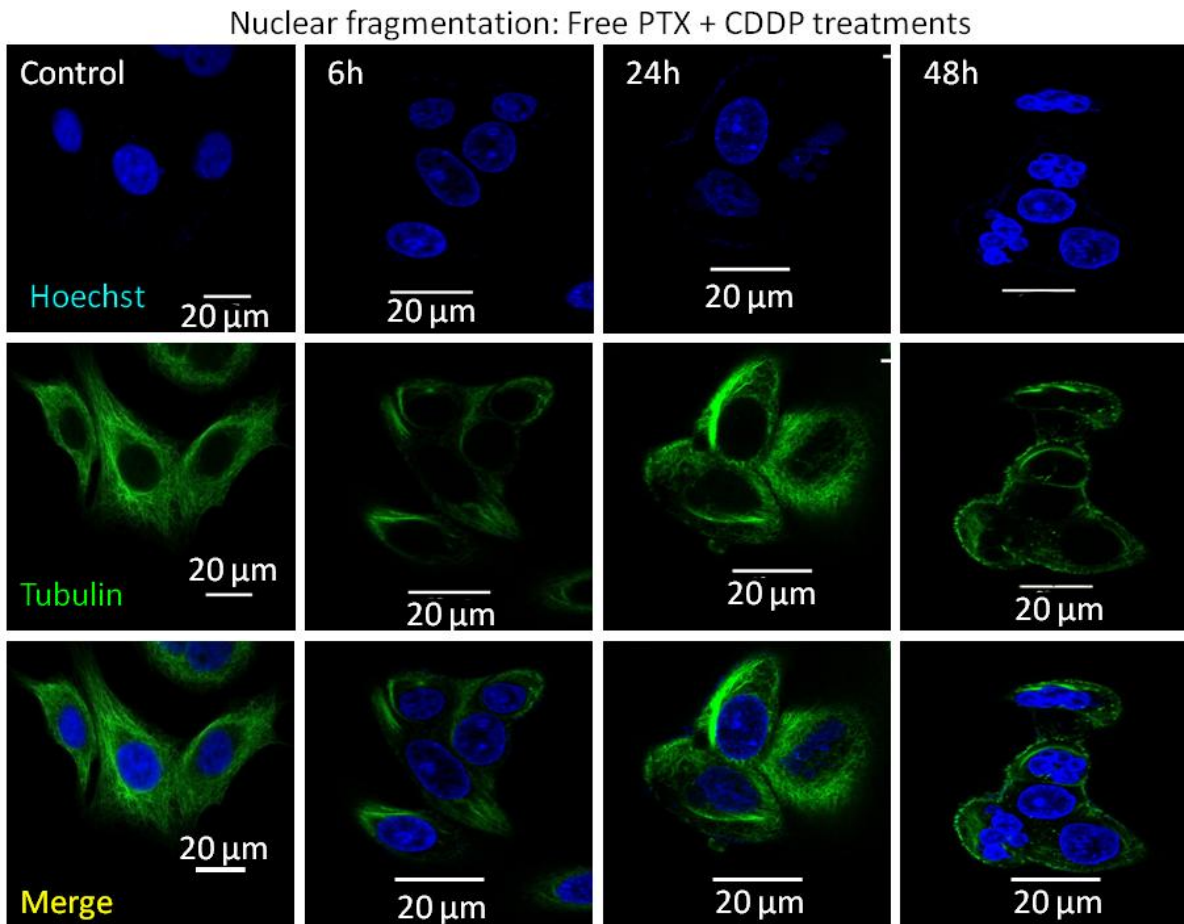

**Figure S16:** CLSM images of MCF7 cells treated with free PTX-CDDP cocktail at 6h, 24h and 48 h time points to visualize the nuclear fragmentation. Nucleus and tubulin were stained with Hoechst 33342 (blue) and Alexa fluor tubulin antibody (green) respectively. Scale bar = 20  $\mu\text{m}$ .

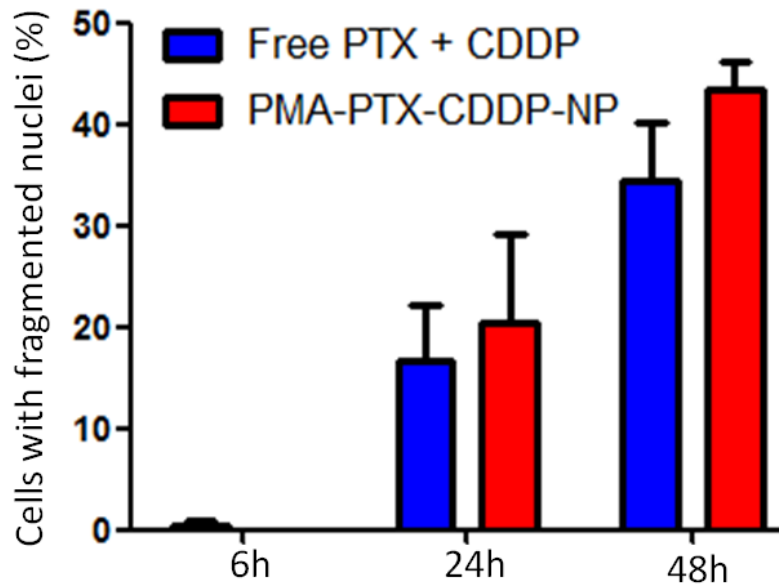

**Figure S17:** Quantification of MCF7 cells with fragmented nuclei after treatment with PMA-PTX-CDDP-NPs and free PTX-CDDP cocktail at 6 h, 24 h and 48 h.

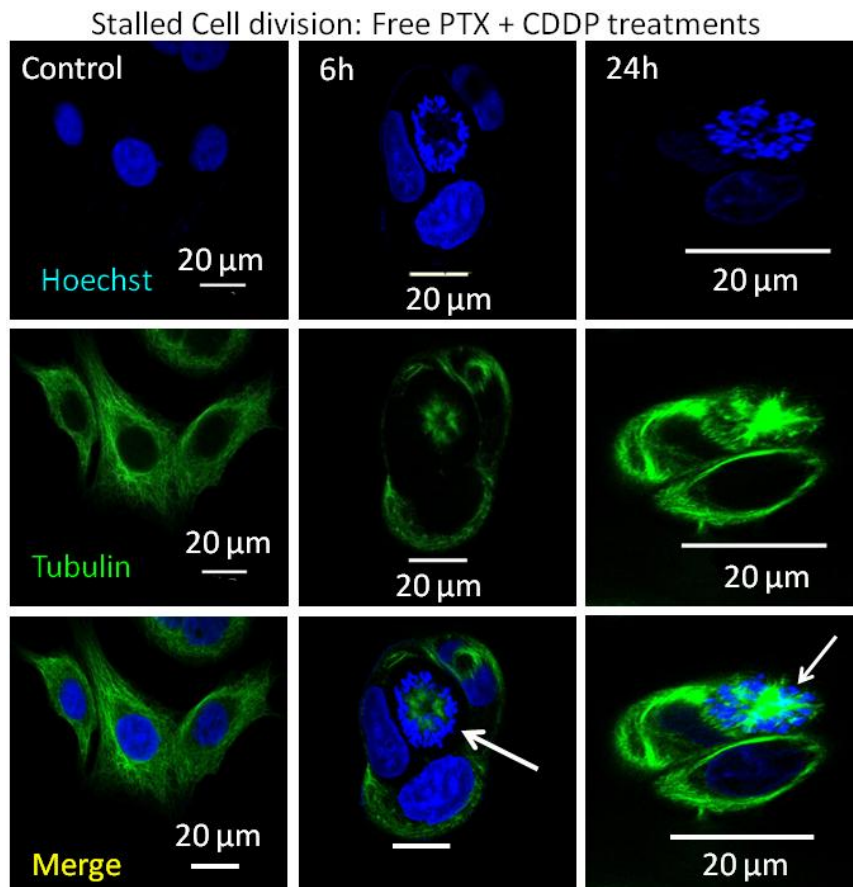

**Figure S18:** CLSM images of MCF7 cells treated with PTX-CDDP cocktail at 6h and 24h time points to visualize the stalled cell division. Nucleus and tubulin were stained with Hoechst 33342 (blue) and Alexa fluor tubulin antibody (green) respectively. Scale bar = 20  $\mu$ m.

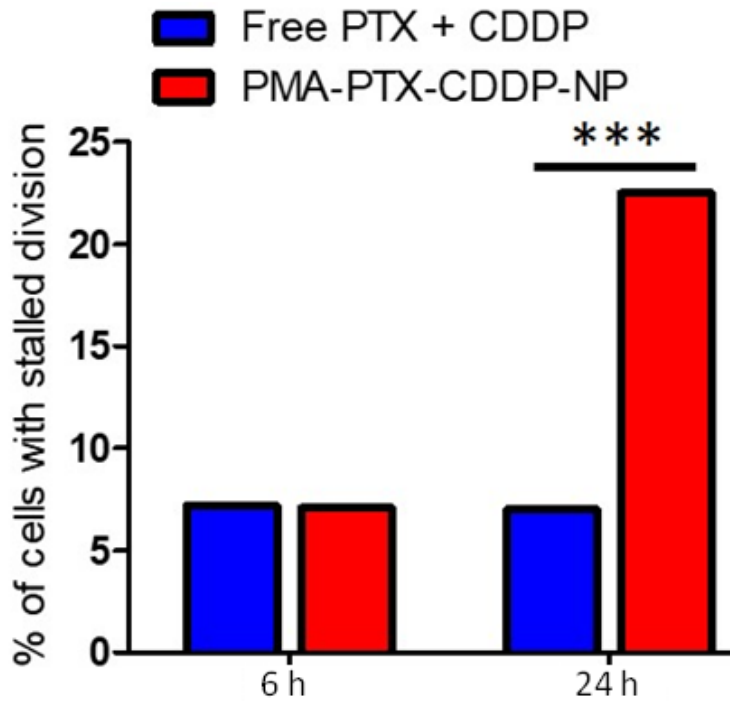

**Figure S19:** Quantification of MCF7 cells with stalled cell division after treatment with PMA-PTX-CDDP-NPs and free PTX-CDDP cocktail at 6h and 24h. The data represented has been pooled from three independent experiments. Statistical analysis was performed using Chi-square test, \*\*\*  $p < 0.0001$ .

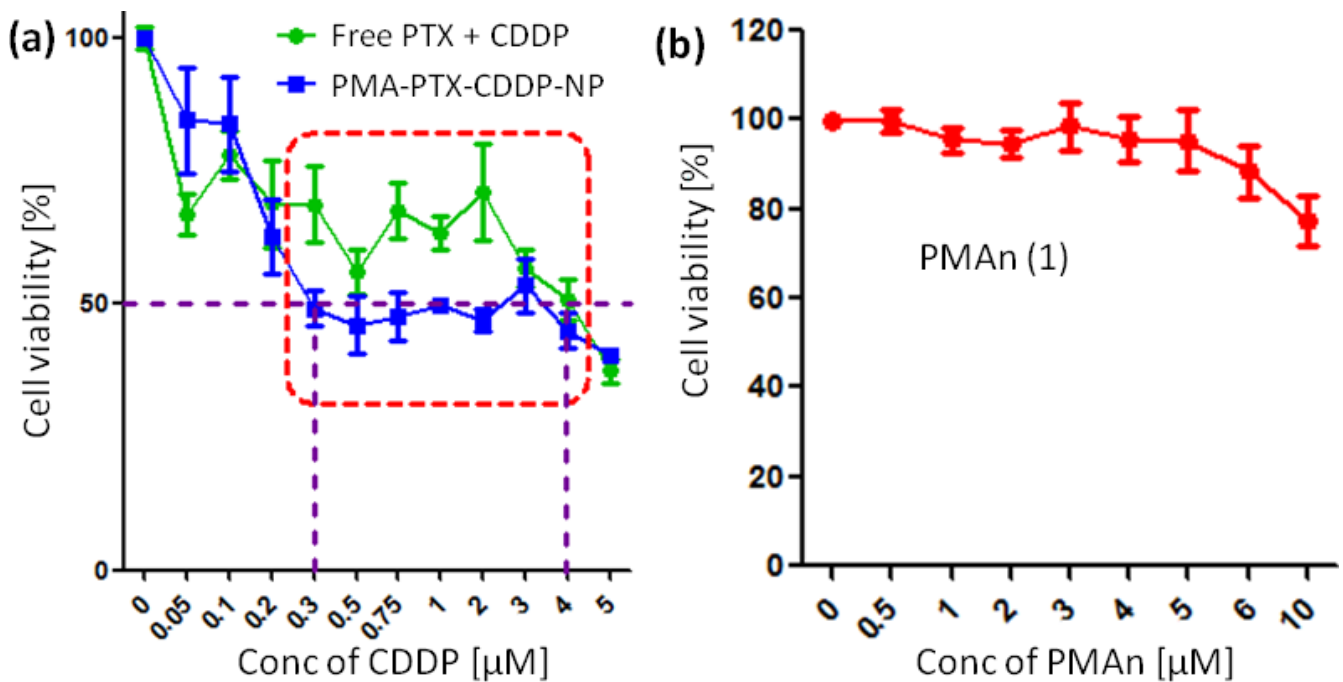

**Figure S20:** MTT assay of (a) PMA-PTX-CDDP-NPs and free PTX-CDDP cocktail in MCF7 cells at 24h post-incubation and (b) PMAAn in a dose dependent manner.

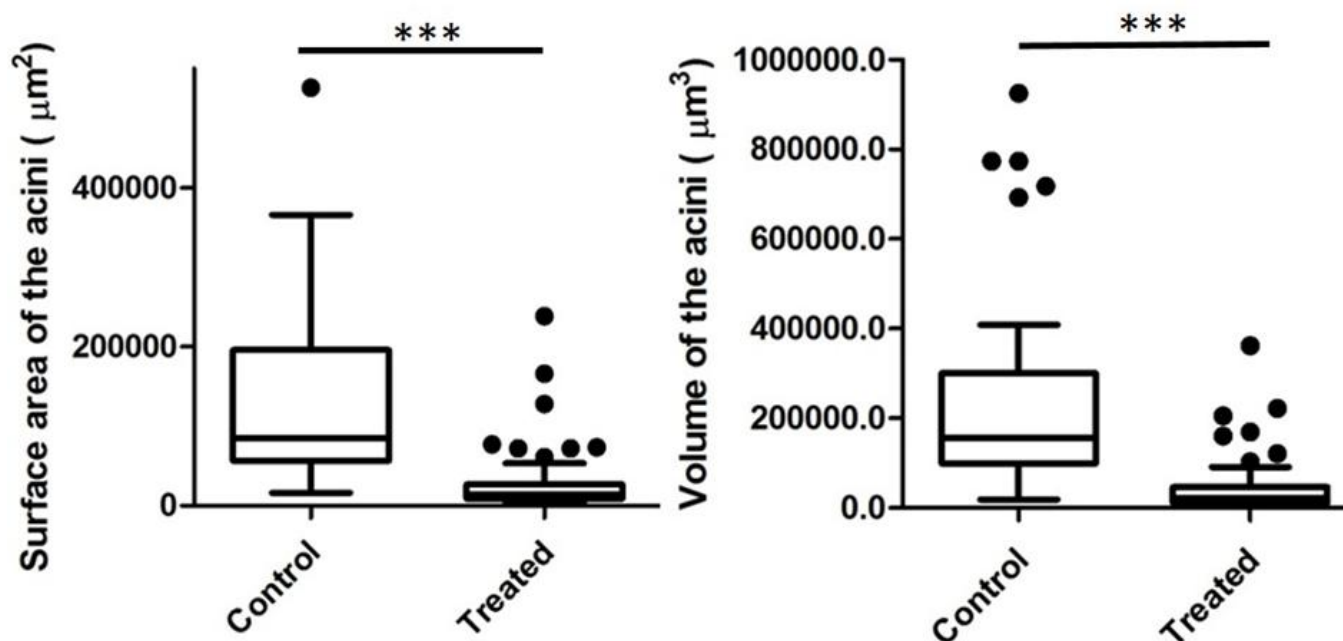

**Figure S21:** Quantification of the surface area and volume of the acini formed from 3D-culture of MCF7 cells after treatment with PMA-PTX-CDDP-NPs. Statistical analysis was performed using Mann Whitney test,  $p < 0.05$  has been considered as statistically significant; \*\*\*  $p < 0.0001$ .

| Atom | Types of atom                      | $\sigma$ (nm) | $\epsilon$ (kJ mol <sup>-1</sup> ) | q      |
|------|------------------------------------|---------------|------------------------------------|--------|
| PT   | Central PT atoms                   | 0.4348        | 1.6736                             | 0.346  |
| COS  | O atom coordinated to PT           | 0.303         | 0.502                              | -0.577 |
| TOS  | Another O atom coordinated to PT   | 0.303         | 0.502                              | -0.577 |
| NAC  | Coordinated N atom cis to COS      | 0.330         | 0.3347                             | -0.225 |
| NAT  | Coordinated N atom trans to COS    | 0.330         | 0.3347                             | -0.225 |
| HC   | H atom attached with Coordinated N | 0.04          | 0.19246                            | 0.180  |

**Table S1:** Atom types and their non-bonded parameters.

| Angle          | $\theta_{ijk}^0$ (deg) | $k_{ijk}^0$ (kJ mol <sup>-1</sup> rad <sup>-2</sup> ) | $r_{ik}^0$ (nm) | $k_{ijk}^{UB}$ (kJ mol <sup>-1</sup> nm <sup>-2</sup> ) |
|----------------|------------------------|-------------------------------------------------------|-----------------|---------------------------------------------------------|
| COS – PT – NAC | 90.0                   | 549.6                                                 | 0.0             | 0.0                                                     |
| COS – PT – NAT | 180.0                  | 549.6                                                 | 0.0             | 0.0                                                     |
| TOS – PT – NAC | 180.0                  | 549.6                                                 | 0.0             | 0.0                                                     |
| TOS – PT – NAT | 90.0                   | 549.6                                                 | 0.0             | 0.0                                                     |

**Table S2:** Table showing calculated angle parameters.

| <b>Dihedral</b> | <b><math>\phi_s</math> (deg)</b> | <b><math>k_\phi</math> (kJ mol<sup>-1</sup>)</b> | <b>multiplicity</b> |
|-----------------|----------------------------------|--------------------------------------------------|---------------------|
| HC-NAC-PT-NAT   | 0.0                              | 2.75                                             | 3                   |
| HC-NAT-PT-NAC   | 0.0                              | 2.75                                             | 3                   |

**Table S3:** Table showing calculated dihedral parameters.
